# Supplementary material for: A highly selective and sensitive electrochemical sensor for dopamine based on a functionalized multi-walled carbon nanotube and poly(N-methylaniline) composite
Source: Royal Society of Chemistry journal article supplement (doi:10.1039/d1ay01943k), 2021-12-17
Supplement: d1ay01943k1.pdf [file d1ay01943k1.pdf]

Supplementary information

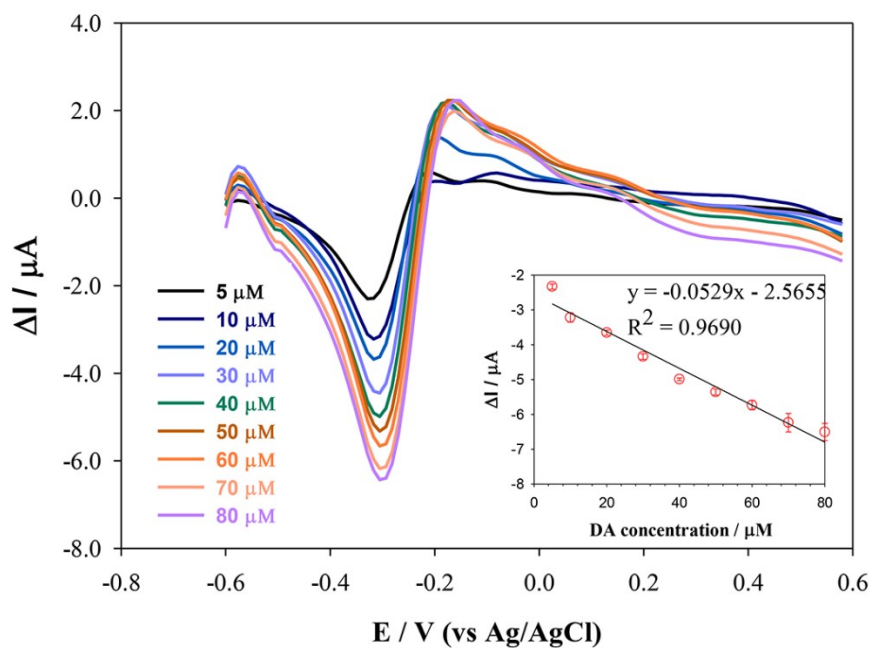

**Figure S1.** DPV curves of different DA concentrations (from bottom to top: 5, 10, 20, 30, 40, 50, 60, 70, 80  $\mu\text{M}$ ) in a 0.1 M phosphate buffer solution at pH 7. RePNMA was used as the surface modifier on SPCE.
